# Supplementary material for: How Large Was the Mortality Increase Directly and Indirectly Caused by the COVID-19 Epidemic? An Analysis on All-Causes Mortality Data in Italy
Source: PubMed Central journal article supplement (PMC7277828; doi:10.3390/ijerph17103452), 2020-05-15
Supplement: ijerph-17-03452-s001.pdf [file ijerph-17-03452-s001.pdf]

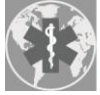

## Supplementary Material

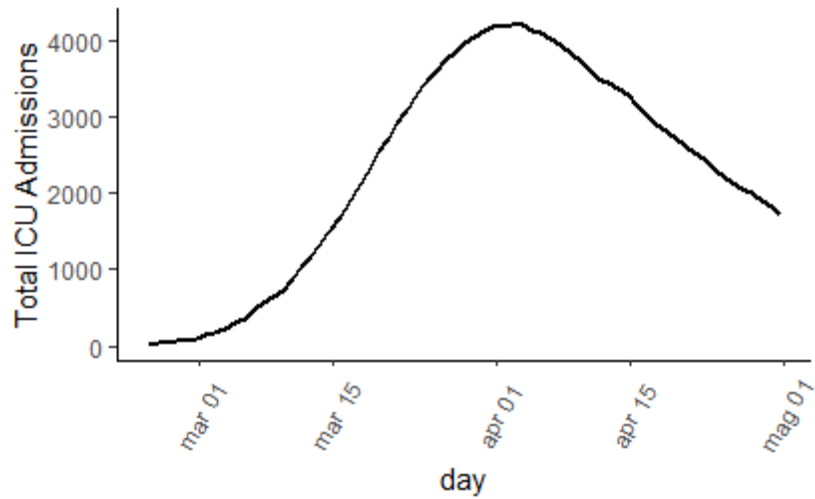

**Figure S1.** Time series of Total COVID-19 ICU admissions.

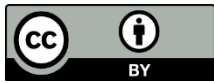

© 2020 by the authors. Submitted for possible open access publication under the terms and conditions of the Creative Commons Attribution (CC BY) license (<http://creativecommons.org/licenses/by/4.0/>).
